1 Partial ligand-receptor engagement yields functional bias at the human complement receptor, C5aR1

2 Shubhi Pandey<sup>1#</sup>, Xaria X. Li<sup>2#</sup>, Ashish Srivastava<sup>1#</sup>, Mithu Baidya<sup>1</sup>, Punita Kumari<sup>1</sup>, Hemlata Dwivedi<sup>1</sup>,

3 Eshan Ghosh<sup>1</sup>, Trent M. Woodruff<sup>2\*</sup> and Arun K. Shukla<sup>1\*</sup>

4 <sup>1</sup>Department of Biological Sciences and Bioengineering, Indian Institute of Technology, Kanpur 208016,

5 India; <sup>2</sup>School of Biomedical Sciences, Faculty of Medicine, The University of Queensland, Brisbane,

6 Australia. (#equal contribution; SP, XL, AS)

7 Running title: *Ligand bias at the human complement receptor*

8 \*To whom correspondence should be addressed: Trent M. Woodruff ([t.woodruff@uq.edu.au](mailto:t.woodruff@uq.edu.au)) or Arun K.

9 Shukla ([arshukla@iitk.ac.in](mailto:arshukla@iitk.ac.in))

10 Keywords: G protein-coupled receptors (GPCRs), cellular signaling, beta-arrestins, biased agonism,

11 trafficking.

12

13

14

15

16

17

18

19

20 **Abstract**

21 The human complement component, C5a, binds two different seven transmembrane receptors termed  
22 as C5aR1 and C5aR2. C5aR1 is a prototypical G protein-coupled receptor that couples to G $\alpha$ i sub-family  
23 of heterotrimeric G proteins and  $\beta$ -arrestins ( $\beta$ arr) following C5a stimulation. Peptide fragments derived  
24 from the carboxyl-terminus of C5a can still interact with the receptor, albeit with lower affinity, and can  
25 act as agonists or antagonists. However, whether such fragments might display ligand bias at C5aR1  
26 remains unexplored. Here, we compare C5a and a modified C-terminal fragment of C5a, C5a<sup>pep</sup>, in terms  
27 of G protein coupling,  $\beta$ arr recruitment, endocytosis and ERK1/2 MAP kinase activation at the human  
28 C5aR1. We discover that C5a<sup>pep</sup> acts as a full-agonist for G protein coupling, while only displaying partial  
29 agonism for  $\beta$ arr recruitment. We also observe that whilst C5a<sup>pep</sup> is significantly less efficient in inducing  
30 C5aR1 endocytosis compared to C5a, it exhibits robust activation of ERK1/2 phosphorylation at levels  
31 similar to C5a. Interestingly, C5a<sup>pep</sup> displays full-agonist efficacy with respect to inhibiting LPS induced IL-  
32 6 secretion in human macrophages, but its ability to induce human neutrophil migration is substantially  
33 lower compared to C5a. Taken together, our findings reveal ligand-bias at C5aR1, not only with respect  
34 to transducer-coupling and receptor trafficking but also in terms of cellular responses. Our findings  
35 therefore establish a framework to explore additional levels of biased signaling and biased ligands at  
36 C5aR1 with therapeutic potential. More generally, our findings may be extended to discover biased  
37 ligands for the broad sub-family of chemokine GPCRs which also interact with chemokine ligands  
38 through a biphasic mechanism.

39

40

41

## 42 **Introduction**

43 The complement peptide C5a, a potent chemotactic agent and an anaphylatoxin, is one of the most  
44 critical components of the human complement system (1). C5a is a 74 amino acid long peptide that is  
45 generated upon the enzymatic cleavage of complement component C5 by C5-converatse. Abnormal  
46 levels of C5a and subsequent signaling triggered by it are crucial in a range of inflammatory disorders  
47 including sepsis, rheumatoid arthritis and psoriasis (1,2). C5a exerts its effects via two seven  
48 transmembrane receptors namely the C5aR1 and C5aR2 (also known as C5L2) (3). Of these, C5aR1 is a  
49 prototypical GPCR that is expressed in macrophages, neutrophils and endothelial cells (3). Upon binding  
50 of C5a, C5aR1 couples to G $\alpha$ i sub-type of heterotrimeric G protein resulting in inhibition of cAMP levels  
51 and mobilization of intracellular Ca<sup>++</sup> (3). Subsequently, C5a also triggers the phosphorylation of C5aR1  
52 followed by recruitment of  $\beta$ -arrestins ( $\beta$ arrs) and receptor internalization (3).

53 Structurally, C5a harbors four different helices and connecting loops, and it is stabilized by the  
54 formation of three disulphide bonds (4). C5a interacts with C5aR1 through two distinct interfaces, one  
55 involving the core of C5a with the N-terminus of the receptor while the other involves the carboxyl-  
56 terminus of C5a with the extracellular side of the transmembrane helices of C5aR1 (Figure 1A) (5). It has  
57 been proposed that the structural determinants for high-affinity binding are provided by the first set of  
58 interaction while the second set of interaction is responsible for driving functional responses through  
59 the receptor (5). Peptides derived from the carboxyl-terminus of C5a can bind to C5aR1, albeit with  
60 much lower affinity compared to C5a, and they can also trigger functional responses (6,7). Whether such  
61 peptides may induce differential coupling of the two major signal transducers namely the G protein and  
62  $\beta$ arrs, and thereby, may exhibit biased responses, remains completely unexplored.

63 Here, we focus on a modified hexa-peptide, referred to as C5a<sup>pep</sup> hereafter (Figure 1B), which  
64 displays highest binding affinity to C5aR1 amongst various C5a fragments (7), and characterize it vis-à-vis

65 C5a with respect to transducer-coupling, functional outcomes and cellular responses. In particular, we  
66 measure the ability of C5a and C5a<sup>pep</sup> to elicit G $\alpha$ i-coupling,  $\beta$ arr recruitment and trafficking, receptor  
67 endocytosis, ERK1/2 MAP kinase activation, IL-6 release and neutrophil migration. We identify a  
68 significant bias in transducer-coupling, functional outcomes (i.e. endocytosis vs. ERK1/2 activation) and  
69 cellular responses (IL-6 release vs. neutrophil migration) between the two ligands which paves the way  
70 for subsequent characterization of physiological outcomes arising from biased signaling at C5aR1.

## 71 **Results and discussion**

72 **C5a<sup>pep</sup> is a full-agonist for G $\alpha$ i-coupling.** Although C5a<sup>pep</sup> exhibits the highest binding affinity for C5aR1  
73 amongst the peptides derived from, and modified based on, the carboxyl-terminus of C5a, its binding  
74 affinity for C5aR1 is still significantly lower than C5a (~70nM for C5a<sup>pep</sup> and ~1nM for C5a) (7). We first  
75 measured the ability of C5a<sup>pep</sup> to trigger G $\alpha$ i-coupling to C5aR1 in HEK-293 cells using the GloSensor  
76 assay (8). Cells were stimulated with Forskolin to generate cAMP followed by incubation with various  
77 doses of C5a and C5a<sup>pep</sup>. We observed that both, C5a and C5a<sup>pep</sup> inhibited cAMP level to a similar extent  
78 at saturating concentrations (Figure 1C) and with a similar time-kinetics (Figure S1). As expected, based  
79 on their binding affinities for the receptor, C5a<sup>pep</sup> was approximately 100 fold less potent in cAMP  
80 inhibition compared to C5a (IC<sub>50</sub> ~ 0.26 nM for C5a and IC<sub>50</sub> ~ 16 nM for C5a<sup>pep</sup>). We also measured the  
81 efficacy of C5a<sup>pep</sup> in C5aR1 expressing CHO cells using the LANCE cAMP assay (9) and observed a pattern  
82 of efficacy and potency very similar to that in HEK-293 cells (Figure 1D).

83 **C5a<sup>pep</sup> is a partial-agonist for  $\beta$ arr recruitment.** Upon C5a stimulation, C5aR1 undergoes  
84 phosphorylation and recruits  $\beta$ arrs which is important for receptor desensitization and internalization  
85 (10). Thus, we next measured the ability of C5a<sup>pep</sup> to induce  $\beta$ arr coupling using a standard co-  
86 immunoprecipitation assay. There are two isoforms of  $\beta$ arrs known as  $\beta$ arr1 and 2 which exhibit a  
87 significant functional divergence despite a high-level of sequence and structural similarity (11). We

88 expressed either  $\beta$ arr1 or  $\beta$ arr2 with FLAG tagged C5aR1 in HEK-293 cells and then measured their  
89 interaction upon ligand stimulation. As presented in Figure 2A, we observed a robust recruitment of  
90 both isoforms of  $\beta$ arrs upon stimulation of cells with C5a. Interestingly, the levels of  $\beta$ arr recruitment  
91 induced by C5a<sup>pep</sup> were significantly lower compared to C5a, even at saturating ligand concentrations. As  
92 a control, we stimulated the cells with W54011, an antagonist of C5aR1 (12), and expectedly, it did not  
93 elicit any significant levels of  $\beta$ arr recruitment. In order to probe if there may be a temporal difference in  
94 C5aR1- $\beta$ arr interaction pattern for C5a vs. C5a<sup>pep</sup>, we further carried out a time-course experiment for  
95  $\beta$ arr recruitment. Still however, C5a<sup>pep</sup>-induced  $\beta$ arr recruitment was significantly lower than C5a (Figure  
96 2B). Taken together with cAMP data presented above, these findings suggest that C5a<sup>pep</sup> is biased  
97 towards G $\alpha$ i-coupling over  $\beta$ arr recruitment as revealed by correlation plots using maximal responses in  
98 the two transducer-coupling assays (Figure 2C).

99 As mentioned earlier, C5a interacts with two 7TMRs, C5aR1 and C5aR2. Of these, C5aR2 (also  
100 known as C5L2) does not exhibit any detectable G-protein coupling although it robustly recruits  $\beta$ arrs  
101 upon agonist-stimulation (9,13,14). We observed that C5a<sup>pep</sup> acts as a partial agonist for  $\beta$ arr2  
102 recruitment, similar to C5aR1 (Figure S2). This finding suggests that the structural determinants of  $\beta$ arr  
103 recruitment in C5aR1 and C5aR2 are conserved while there must be a significant divergence at the level  
104 receptor conformation which dictates G-protein coupling.

105 **C5a<sup>pep</sup> triggers slower endosomal trafficking of  $\beta$ arrs.**  $\beta$ arrs are normally distributed in the cytoplasm  
106 and upon agonist-stimulation, they traffic to the membrane and interact with the receptors (15).  
107 Subsequently, upon prolonged agonist-stimulation,  $\beta$ arrs either dissociate from the receptor (class A  
108 pattern of  $\beta$ arr recruitment) or co-internalized with activated receptors in endosomal vesicles (class B  
109 pattern of  $\beta$ arr recruitment) (15). In order to probe whether C5a<sup>pep</sup> might differ from C5a with respect to  
110  $\beta$ arr trafficking patterns, we co-expressed C5aR1 with either  $\beta$ arr1-YFP or  $\beta$ arr2-YFP and visualized the

111 trafficking of  $\beta$ arrs using confocal microscopy. We observed that C5a<sup>pep</sup> was capable of promoting  
112 surface translocation of  $\beta$ arrs at similar levels as C5a during the early phase of agonist-stimulation  
113 (Figure 3, second panels). However, we observed that C5a<sup>pep</sup> was significantly slower in promoting the  
114 appearance of  $\beta$ arrs in endosomal punctae and vesicles compared to C5a (Figure 3, third panels)  
115 although ultimately it did induce robust endosomal localization of  $\beta$ arrs (Figure 3, fourth panels).

116 **C5a<sup>pep</sup> exhibits bias between ERK1/2 MAP kinase activation and receptor endocytosis.** In order to  
117 probe whether bias in transducer coupling may translate into differential functional outcomes, we next  
118 measured the ability of C5a<sup>pep</sup> to induce receptor endocytosis and ERK1/2 MAP kinase activation in HEK-  
119 293 cells. In agreement with our data on  $\beta$ arr recruitment and trafficking presented earlier in Figures 2  
120 and 3, we observed a significantly lower levels of receptor endocytosis induced by C5a<sup>pep</sup> in comparison  
121 to C5a (Figure 4A). This observation hints that  $\beta$ arrs may play a crucial role in endocytosis of C5aR1 and  
122 therefore, weaker  $\beta$ arr recruitment by C5a<sup>pep</sup> translates into lower endocytosis. Interestingly however,  
123 C5a<sup>pep</sup> was as efficacious as C5a in stimulating phosphorylation of ERK1/2 MAP kinase in HEK-293 cells,  
124 at least at the time-points that were tested in this experiment (Figure 4B-C). Thus, correlation of  
125 maximal levels of endocytosis triggered by C5a and C5a<sup>pep</sup> with the ERK1/2 phosphorylation reveals a  
126 bias of C5a<sup>pep</sup> in these two functional responses (Figure 4D).

127 **C5a<sup>pep</sup> exhibits  $\beta$ arr isoform bias at a chimeric C5aR1.** The interaction of  $\beta$ arrs with GPCRs is a biphasic  
128 process, which involves the receptor-tail (i.e. phosphorylated carboxyl-terminus) and the receptor-core  
129 (cytoplasmic surface of the transmembrane bundle) (16). In addition to the fully-engaged complexes  
130 involving both the tail and the core interaction, receptor- $\beta$ arr complexes engaged only through receptor  
131 tail are functionally competent in terms of mediating receptor endocytosis and signaling (17-19). Based  
132 on the stability of their interaction with  $\beta$ arrs, GPCRs are categorized as class A and B which represent  
133 transient and stable interactions, respectively (15). Receptors having clusters of phosphorylatable

134 residues in their carboxyl-terminus (such as the vasopressin receptor, V2R) typically interact stably with  
135  $\beta$ arrs. As C5aR1 does not harbor such clusters, we generated a chimeric C5aR1 where we grafted the  
136 carboxyl-terminus of the V2R on C5aR1, and refer to this construct as C5a-V2R (Figure 5A). We first  
137 measured the cAMP response of C5aV2R upon stimulation with C5a and C5a<sup>pep</sup>, and observed a similar  
138 efficacy and potency profile as for the wild-type C5aR1 (Figure 5B). Interestingly however, we observed  
139 an equal recruitment of  $\beta$ arr1 by C5a<sup>pep</sup> and C5a with C5a-V2R (Figure 5C). On the other hand,  $\beta$ arr2  
140 recruitment induced by C5a<sup>pep</sup> was still significantly weaker than C5a (Figure 5D). This resulted in a bias  
141 at the level of  $\beta$ arr isoform recruitment for the chimeric receptor as evident in the correlation plot  
142 (Figure 5E).

143 Our observation of  $\beta$ arr isoform preference for the chimeric receptor is important because  
144 several high-throughput screening assays, for example, Tango and enzyme-complementation, utilize  
145 chimeric GPCRs with V2R tail. This may result in miscalculation of ligand-bias and therefore, our data  
146 suggest that the patterns observed using chimeric receptors should be reanalyzed using wild-type  
147 receptors.

148 **C5a<sup>pep</sup> elicits biased cellular responses.** C5aR1 is endogenously expressed at high levels in macrophages  
149 and neutrophils, where it modulates multiple inflammatory responses (3). Stimulation of C5aR1 in  
150 human macrophages reduces LPS-induced release of IL-6 (2), whereas neutrophil C5aR1 activation  
151 induces rapid chemotaxis (3). To assess whether C5a<sup>pep</sup> might exhibit a bias at the level of these cellular  
152 responses, we utilized HMDMs and PMNs to measure IL-6 release and migration, respectively. First, we  
153 measured Ca<sup>++</sup> mobilization in HMDMs upon stimulation by C5a and C5a<sup>pep</sup> and observed, once again, a  
154 full-agonist profile of C5a<sup>pep</sup> (Figure 6A and S3). In addition, the inhibition of LPS-induced IL-6 release in  
155 HMDMs was also comparable for both C5a and C5a<sup>pep</sup> (Figure 6B). Notably however, we observed that  
156 C5a<sup>pep</sup> displayed a significantly blunted response in neutrophil migration compared to C5a even at

157 saturating doses (Figure 6C). These observations therefore reveal a bias at the level of cellular responses  
158 exhibited by C5a<sup>pep</sup> as obvious in the correlation plot (Figure 6D). These findings suggest that the bias  
159 displayed by C5a<sup>pep</sup> at the level of transducer-coupling and functional responses measured in HEK-293  
160 cells is preserved and translated into a cellular response bias in primary cells at the endogenous level of  
161 receptor.

162 Interestingly, C5a<sup>pep</sup> stimulation resulted in only a sub-maximal phosphorylation of ERK1/2 in  
163 HMDMs compared to C5a (Figure S4). This is in contrast with our observation in HEK-293 cells  
164 mentioned above where C5a<sup>pep</sup> stimulates ERK1/2 phosphorylation at levels similar to C5a (Figure 4B-C).  
165 This is particularly interesting considering that C5a<sup>pep</sup> behaves as full-agonist in Ca<sup>++</sup> mobilization  
166 experiment in HMDMs. There is growing evidence for context-specific effector-coupling and functional  
167 responses downstream of several GPCRs (20,21). These emerging findings have refined our current  
168 understanding of biased signaling by providing substantial evidence of additional levels of complexities  
169 in GPCR signaling. Our data with C5a<sup>pep</sup>, especially in the context of ERK1/2 activation in HMDMs, further  
170 adds to this important paradigm of biased GPCR signaling.

171 It is important to mention here that chemokines, like complement C5a, also interact with their  
172 cognate GPCRs through a biphasic mechanism. Thus, it is tempting to speculate that fragments derived  
173 from the C-terminus of chemokines may also exhibit biased signaling through their receptors. Our  
174 findings also suggest that a more comprehensive analysis of C5a fragments might yield  $\beta$ arr-biased  
175 ligands at C5aR1. Although crystal structures of C5aR1 bound to small molecule antagonists have been  
176 determined recently (22,23), C5a-bound structure is still not available. High-resolution structure details  
177 of C5a-bound C5aR1 in future may provide structural insights into differential engagement of C5a<sup>pep</sup>  
178 compared to C5a and how these differential interactions in the ligand-binding pocket yield transducer-  
179 coupling bias.



180 In summary, we discover C5a<sup>pep</sup> as a biased C5aR1 agonist at the levels of transducer-coupling,  
181 functional outcomes and cellular responses. Going forward, an interesting avenue might be to evaluate  
182 the physiological responses elicited by C5a<sup>pep</sup> *in-vivo*. Given that C5a attenuates LPS-mediated cytokine  
183 production from macrophages ((24) (Fig 6), a biased ligand such as C5a<sup>pep</sup> which retains this beneficial  
184 activity, whilst diminishing the more pro-inflammatory activities of neutrophil migration, may be a novel  
185 therapeutic approach for inflammatory disorders. Furthermore, as we have demonstrated the  
186 recruitment of both isoforms of  $\beta$ arr to C5aR1, it would be interesting to evaluate the shared and  
187 distinct roles of these  $\beta$ arr in regulation and signaling of C5aR1. It is also notable that the second  
188 receptor activated by C5a (C5aR2), does not exhibit any detectable G protein coupling but displays  
189 robust  $\beta$ arr recruitment (13). Thus, C5aR2 may represent a natural example of a  $\beta$ arr-biased receptor  
190 making it an attractive target to further investigate specific role of  $\beta$ arrs in C5a mediate signaling.

## 191 **Materials and methods**

192 **General reagents, constructs and cell culture:** Most of the reagents were purchased from Sigma unless  
193 mentioned otherwise. Coding region of human C5aR1 was cloned in pcDNA3.1 vector with N-terminal  
194 signal sequence and FLAG-tag. For the construction of chimeric C5a-V2R construct, human C5aR1(1-326)  
195 was amplified and cloned in a modified pcDNA3.1 vector containing coding region of V2R C-terminus  
196 along with N-terminal signal sequence and FLAG tag. Coding regions of bovine  $\beta$ arr1 and  $\beta$ arr2 were  
197 cloned in pCMV6-AC-mYFP vector with stop codon being placed before mYFP. C5a<sup>pep</sup> was synthesized  
198 from Genscript. HEK-293 cells (ATCC) were maintained in DMEM at 5% CO<sub>2</sub>. Recombinant human C5a  
199 (C5a) was either purchased from Sino Biological or purified following a previously published protocol  
200 using a plasmid kindly provided by Prof. Gregers Rom Andersen (Aarhus University) (4). Ultrapure  
201 lipopolysaccharide from *Escherichia coli* K12 strain was purchased from Invivogen. Bovine serum  
202 albumen (BSA) was purchased from Sigma. For cell culture, trypsin-EDTA, Hank's Balanced Salt Solution

203 (HBSS), HEPES, Dulbecco's Modified Eagle's Medium (DMEM), phenol-red free DMEM, Ham's F12,  
204 Iscove's Modified Dulbecco's Medium (IMDM) and Penicillin-Streptomycin were purchased from Thermo  
205 Fisher Scientific. Dulbecco's phosphate-buffered saline (DPBS) was purchased from Lonza.

206 The following cell lines were cultured as previously described (25). Chinese hamster ovary cells  
207 stably expressing the human C5aR1 (CHO-C5aR1) were maintained in Ham's F12 medium containing  
208 10% foetal bovine serum (FBS), 100 U/ml penicillin, 100 µg/ml streptomycin and 400 µg/ml G418  
209 (Invivogen). Human embryonic kidney-293 (HEK293) cells were maintained in DMEM medium containing  
210 10% FBS, 100 IU/ml penicillin and 100 µg/ml streptomycin. To ensure the consistency of cell function,  
211 cell morphology was continually monitored and neither cell line was used beyond passage twenty.

212 To generate human monocyte-derived macrophages (HMDM), human buffy coat blood from  
213 anonymous healthy donors was obtained through the Australian Red Cross Blood Service. Human CD14+  
214 monocytes were isolated from blood using Lymphoprep density centrifugation (STEMCELL) followed by  
215 CD14+ MACS magnetic bead separation (Miltenyi Biotec). The isolated monocytes were differentiated  
216 for 7 days in IMDM supplemented with 10% FBS, 100 U/ml penicillin, 100 µg/ml streptomycin and 15  
217 ng/ml recombinant human macrophage colony stimulating factor (hM-CSF) (Peprotech) on 10 mm  
218 square dishes (Sterilin). Non-adherent cells were removed by washing with DPBS and the adherent  
219 differentiated HMDMs were harvested by gentle scraping.

220 Human peripheral blood neutrophils (hPMN) were obtained from venous whole blood (20 ml)  
221 collected from healthy volunteers under informed consent. Samples were collected using venepuncture  
222 into BD K2EDTA Vacutainer® blood collection tubes and processed within 5 hours. For neutrophil  
223 isolation, the anticoagulated blood was firstly layered over a Lymphoprep (STEMCELL) density gradient  
224 and centrifuged (800×g, 30 min, 22°C). The cell pellet in the densest layer of the gradient, containing a  
225 mixture of hPMN and erythrocytes was collected. The residual erythrocytes were removed using

226 hypotonic lysis. Isolated neutrophils were counted and resuspended in a HBSS-based migration buffer  
227 (containing calcium and magnesium, supplemented with 20 mM HEPES and 0.5 % BSA) at a desired  
228 concentration. Cell viability was  $\geq 92$  % as assessed by Trypan blue exclusion on a Bio-Rad TC20™  
229 automated cell counter.

230 **Preparation of C5aR1 expressing stable HEK-293 cell line:** 50-60% confluent HEK293 cells were  
231 transfected with 7 $\mu$ g FLAG tagged C5aR1 DNA complexed with 21 $\mu$ g PEI (polyethylenimine). Next day,  
232 stable selection was started with optimal dose of G418 along with untransfected cells kept as negative  
233 control. After completion of stable selection, clonal population was prepared by limited dilution  
234 method. Highest expressing clones were propagated further and kept under G418 selection throughout  
235 the course of experiments. Surface expression of C5aR1 was measured using a previously described whole  
236 cell surface ELISA protocol (26).

237 **ERK1/2 phosphorylation assay:** Agonist-induced ERK1/2 phosphorylation was measured primarily using  
238 a previously described Western blotting based protocol (27). C5aR1 expressing stable cell lines were  
239 seeded into 6-well plate at a density of 1 million cells per well. Cells were serum starved for 12 hour  
240 followed by stimulation with 1 $\mu$ M of C5a and 10 $\mu$ M of C5a<sup>dep</sup> respectively at selected time points. After  
241 the completion of time course, media was aspirated and cells were lysed in 100 $\mu$ l 2x SDS dye per well.  
242 Cells were heated at 95°C for 15 minute followed by centrifugation at 15000 rpm for 10 minute. 10 $\mu$ l of  
243 lysate was loaded per well and separated in SDS-PAGE followed by western blotting. Blots were blocked  
244 in 5% BSA (in TBST) for 1 hour and incubated overnight with rabbit phospho ERK (cat #9101/CST)  
245 primary antibody at 1:5000 dilution. Blots were washed thrice with TBST for 10 minute each and  
246 incubated with anti-rabbit HRP-coupled secondary antibody (1:10000, cat#A00098/Genscript) for 1  
247 hour. Blots were washed again with TBST for three times and developed with promega ECL solution on

248 chemidoc (BioRad). Blots were stripped with low pH stripping buffer and then re-probed for total ERK  
249 using rabbit total ERK (cat#9102/CST) primary antibody at 1:5000 dilution.

250           The ligand-induced phospho-ERK1/2 signaling was assessed using the AlphaLISA *Surefire Ultra* p-  
251 ERK1/2 (Thr202/Tyr204) kit (PerkinElmer) following the manufacturer's protocol. Briefly, HMDMs were  
252 seeded (50,000/well) in tissue culture-treated 96-well plates (Corning) for 24 hours and serum-starved  
253 overnight. All ligand dilutions were prepared in serum-free medium (SFM) containing 0.1% BSA. For  
254 stimulation, cells were incubated with respective ligands for 10 min at room temperature and then  
255 immediately lysed using AlphaLISA lysis buffer on a microplate shaker (450 rpm, 10 min). For the  
256 detection of phospho-ERK1/2 content, cell lysate (5  $\mu$ l/well) was transferred to a 384-well ProxiPlate  
257 (PerkinElmer) and added to the donor and acceptor reaction mix (2.5  $\mu$ l/ well, respectively) with 2-hour  
258 incubation at room temperature in the dark. On a Tecan Spark 20M, following laser irradiation of donor  
259 beads at 680 nm, the chemiluminescence of acceptor beads at 615 nm was recorded.

260 **Receptor Internalization Assay:** 50-60% confluent *HEK293* cells were transfected with 3.5 $\mu$ g of FLAG-  
261 tagged C5aR1 DNA by polyethylenimine method of transfection at DNA:PEI ratio of 1:3. 24 hour post-  
262 transfection, 0.15million cells per well were seeded in 24-well plate (pre-coated with 0.01% Poly-D-  
263 Lysine). After 24 hour, cells were serum starved for 6hour followed by stimulation with 1 $\mu$ M of C5a and  
264 10 $\mu$ M C5a<sup>pep</sup> respectively for selected time points. After stimulation, cells were washed once with ice-  
265 cold 1XTBS. Cells were then fixed with 4% (w/v) PFA on ice for 20min and washed thrice with TBS to  
266 remove PFA. Blocking was done with 1%BSA prepared in 1XTBS for 1.5 hour. This was followed by  
267 incubation of cells with HRP-conjugated anti-FLAG M2 antibody (Sigma) at a dilution of 1:2000 prepared  
268 in 1% BSA+1XTBS for 1.5 hour. Afterwards, cells were washed thrice with 1% BSA+1XTBS. Surface  
269 expression was measured by incubating cells with 200uL TMB (Genscript) per well and reaction was  
270 stopped by transferring 100uL of developed colored solution to a 96-well plate already containing 100uL

271 of 1M H<sub>2</sub>SO<sub>4</sub>. Absorbance was read at 450nm in a multi-plate reader (Victor X4). For normalization, cell  
272 density was measured using janus green. Briefly, TMB was removed and cells were washed twice with  
273 1XTBS followed by incubation with 0.2% (w/v) janus green for 15 min. Destaining was done with three  
274 washes of 1ml distilled water. Stain was eluted by adding 800uL of 0.5N HCl per well. 200uL of this  
275 solution was transferred to a 96-well plate and absorbance was read at 595nm. Data normalization was  
276 done by dividing A<sub>450</sub> by A<sub>595</sub> values.

277 **GloSensor Assay for cAMP Measurement:** 50-60% confluent *HEK293* cells were co-transfected with  
278 3.5µg each of C5aR1 and 22F (promega) plasmids. 24 hour post-transfection, cells were trypsinized and  
279 harvested by centrifugation at 1500rpm for 10 minute. Media was aspirated and cells were resuspended  
280 in luciferin sodium solution (0.5mg/ml) (Gold Biotech) prepared in 1X Hanks Balanced Salt Solution  
281 (HBSS/Gibco) and 20mM HEPES pH 7.4. Cells were then seeded in a 96-well plate at a density of 0.4  
282 million cells per well and kept at 37°C for 1.5 hour in the CO<sub>2</sub> incubator followed by incubation at room  
283 temperature for 30 minute. Basal reading was read on luminescence mode of multi-plate reader (Victor  
284 X4) and cycles were adjusted until basal values were stabilized. Cells were then incubated with 1uM  
285 forskolin and readings were recorded until maximum luminescence values were obtained. This was  
286 followed by stimulation of cells with specified concentrations of C5a and C5a<sup>pep</sup> and values were  
287 recorded for 1 hour. Data was normalized with respect to minimal stimulation dose of ligand after basal  
288 correction.

289 **Cross-linking and Co-immunoprecipitation (CoIP):** 50-60% confluent *HEK293* cells were co-transfected  
290 with C5aR1 and βarr1/ βarr2 plasmids by PEI (as mentioned earlier). 48 hour post- transfection, cells  
291 were serum starved for 6 hours and stimulated with respective doses of C5a/C5a<sup>pep</sup>, harvested and  
292 proceeded for cross-linking experiment. Cells were lysed by dounce homogenization in 20mM HEPES  
293 pH7.4, 100mM NaCl, 1X phosphatase inhibitor cocktail (Roche), 2mM benzamidine hydrochloride and

294 1mM PMSF. This was followed by addition of 1mM dithiobis(succinimidyl-propionate) from a freshly  
295 prepared 100mM stock in DMSO. Lysate was tumbled at room temperature for 40 minute and reaction  
296 was quenched by adding 1M Tris pH 8.5. Lysates were solublized in 1%(v/v) MNG for 1 hour at room  
297 temperature followed by centrifugation at 15000 rpm for 15min. Cleared supernatant was transferred  
298 to a separate tube already containing pre-equilibrated M1-FLAG beads supplemented with 2mM CaCl<sub>2</sub>.  
299 Solution was tumbled for 2hour at 4°C and washed alternately with low salt buffer(20mM HEPES pH 7.4,  
300 150mM NaCl, 0.01% MNG, 2mM CaCl<sub>2</sub>) and high salt buffer(20mM HEPES pH7.4, 350mM NaCl, 0.01%  
301 MNG, 2mM CaCl<sub>2</sub>) respectively. The bound proteins were eluted in FLAG-elution buffer containing  
302 20mM HEPES pH 7.4, 150mM NaCl, 2mM EDTA, 0.01% MNG and 250ug/mL FLAG peptide. Co-  
303 immunoprecipitated  $\beta$ arr was detected by western blotting using rabbit anti- $\beta$ arr mAb (1:5000, CST Cat#  
304 D24H9). Blots were stripped and reprobed for receptor with HRP-conjugated anti-FLAG M2 antibody  
305 (1:5000). Blots were developed on Chemidoc (BioRad) and quantified using ImageLab software (BioRad).

306 **BRET assay for measuring the interaction of  $\beta$ arr2 with C5aR2:** C5a-mediated  $\beta$ arr2 recruitment to  
307 C5aR2 was measured using bioluminescent resonance energy transfer (BRET) as previously described  
308 (9). Briefly, HEK293 cells were transiently transfected with C5aR2-Venus and  $\beta$ arr2-Rluc8 constructs  
309 using XTG9 (Roche). 24 hours post transfection, cells were gently detached using 0.05% trypsin-EDTA  
310 and seeded (100,000/well) onto white 96-well TC plates (Corning) in phenol-red free DMEM containing  
311 5% FBS. On the following day, cells were firstly incubated with the substrate EnduRen (30  $\mu$ M, Promega)  
312 for 2 hours (37 °C, 5 % CO<sub>2</sub>). On a Tecan Spark 20M microplate reader (37°C), the BRET light emissions  
313 (460-485 and 520-545 nm) were continuously monitored for 25 reads with respective ligands added  
314 after the first 5 reads. The ligand-induced BRET ratio was calculated by subtracting the Venus (520-545  
315 nm) over Rluc8 (460-485 nm) emission ratio of the vehicle-treated wells from that of the ligand-treated  
316 wells.

317 **Confocal Microscopy:** For visualization of ligand-induced  $\beta$ arr recruitment, *HEK293* cells were co-  
318 transfected with C5aR1 and  $\beta$ arr1-YFP or  $\beta$ arr2-YFP plasmids in 1:1 ratio (total 7 $\mu$ g) by PEI. 24 hour post-  
319 transfection, 1million cells were seeded in 35mm glass bottom dish pre-coated with 0.01% Poly-D-  
320 Lysine. After 24 hour, cells were serum starved for 6 hour and stimulated with respective doses of C5a  
321 and C5a<sup>pep</sup>. For live-cell imaging, images were acquired using Carl Zeiss LSM780NLO confocal microscope  
322 for specified time intervals and image processing was done in ZEN lite (Zen-blue/ ZEN-black) software  
323 from Zeiss.

#### 324 **Intracellular calcium mobilization assays**

325 Ligand-induced intracellular calcium mobilization was assessed using Fluo-4 NW Calcium Assay kit  
326 (Thermo Fisher Scientific) following the manufacturer's instructions. Briefly, HMDMs were seeded  
327 (50,000/well) in black clear-bottom 96-well TC plates (Corning) for 24 hours before the assay. Cells were  
328 firstly stained with the Fluo-4 dye in assay buffer (1X HBSS, 20 mM HEPES) for 45 min (37 °C, 5 % CO<sub>2</sub>).  
329 Respective ligands were prepared in assay buffer containing 0.5 % BSA. On a Flexstation 3 platform, the  
330 fluorescence (Ex/Em: 494/516 nm) was continually monitored for a total of 100 seconds with ligand  
331 addition performed at 16 seconds.

#### 332 **Chemotaxis assays**

333 Ligand-induced hPMN migration was assessed using 6.5 mm Transwell polycarbonate membrane inserts  
334 with 3.0  $\mu$ m pore (Corning) to create a modified Boyden chamber (28). Freshly isolated hPMNs were  
335 seeded onto inserts (500,000/well) for 20 min (37 °C, 5 % CO<sub>2</sub>) in a HBSS-based migration buffer as  
336 described in previous section. To initiate cell migration, respective ligands prepared in migration buffer  
337 were added to the receiver wells in duplicates. After 60-min migration (37 °C, 5 % CO<sub>2</sub>), the inserts were  
338 gently washed once with DPBS, and the residual cells on the upper side of the membrane were removed

339 using a cotton swab. Migrated cells were detached by adding 500  $\mu$ l/well Accumax solution (Invitrogen)  
340 to the receiver wells (10 min, room temperature) and then counted using a Bio-Rad TC20™ automated  
341 cell counter.

#### 342 **Measurement of cytokines release using ELISA**

343 The immunomodulatory effect of respective C5aR ligands on LPS-induced cytokine release was assessed  
344 in primary human macrophages as previously described (29). HMDMs were seeded in 96-well TC plates  
345 (100,000 /well) for 24 hours before treatment. All ligands were prepared in serum-free IMDM  
346 containing 0.1% BSA. For stimulation, cells were co-treated with LPS and respective C5aR ligands for 24  
347 hours (37 °C, 5 % CO<sub>2</sub>). The supernatant was collected and stored at -20 °C till use. IL-6 levels in the  
348 supernatant were quantified using respective human enzyme-linked immunosorbent assay (ELISA) kits  
349 (BD OptEIA) as *per* the manufacturer's protocol.

#### 350 **Data collection, processing and analysis**

351 All experiments were conducted in triplicate and repeated on at least 3 separate days (for cell lines) or  
352 using cells from at least 3 donors (for HMDMs) unless otherwise specified. Data was analyzed using  
353 GraphPad software (Prism 7.0) and expressed as mean  $\pm$  standard error of the mean (SEM). Data from  
354 each repeat was normalised accordingly before being combined. For all dose-response assays,  
355 logarithmic concentration-response curves were plotted using combined data and analyzed to  
356 determine the respective potency values.

357 **Acknowledgment:** We thank the members of our laboratories for critical reading of the manuscript. The  
358 research program was supported by the DBT Wellcome Trust India Alliance (Intermediate Fellowship to  
359 A.K.S.—IA/I/14/1/501285), Department of Biotechnology, Government of India (Innovative Young  
360 Biotechnologist Award to A.K.S.—BT/08/IYBA/2014-3), LADY TATA Memorial Trust Young Researcher



361 Award to A.K.S., Science and Engineering Research Board (SERB) (SB/SO/BB-121/2013), Council of  
362 Scientific and Industrial Research (CSIR) (37[1637]14/EMR-II), and the National Health and Medical  
363 Research Council of Australia (NHMRC; project grant 1082271). A.K.S. is an EMBO Young Investigator,  
364 and T.M.W. is supported by a NHMRC Career Development Fellowship (1105420). We thank Mr. Ravi  
365 Ranjan for helping with C5aR1 and C5aR1-V2R cloning and optimization of C5a purification.

366 **Author's contribution:** SP and AS performed most of the experiments in HEK-293 cells except the  
367 confocal microscopy which was carried out by MB and PK; HD assisted in GloSensor assay and  
368 characterization of C5aR1-V2R constructs. XL performed Ca<sup>++</sup> response assay in CHO-K1 cells, IL-6 release  
369 and PMN migration experiments under the supervision of TW. All authors contributed manuscript  
370 writing and approved the final draft. AKS supervised the overall project.

371

372

373

374

375

376

377

378

379

380

381 **References**

- 382 1. Manthey, H. D., Woodruff, T. M., Taylor, S. M., and Monk, P. N. (2009) Complement component 5a (C5a).  
383 *Int J Biochem Cell Biol* **41**, 2114-2117
- 384 2. Ward, P. A. (2004) The dark side of C5a in sepsis. *Nat Rev Immunol* **4**, 133-142
- 385 3. Klos, A., Wende, E., Wareham, K. J., and Monk, P. N. (2013) International Union of Basic and Clinical  
386 Pharmacology. [corrected]. LXXXVII. Complement peptide C5a, C4a, and C3a receptors. *Pharmacol Rev* **65**,  
387 500-543
- 388 4. Schatz-Jakobsen, J. A., Yatime, L., Larsen, C., Petersen, S. V., Klos, A., and Andersen, G. R. (2014) Structural  
389 and functional characterization of human and murine C5a anaphylatoxins. *Acta Crystallogr D Biol*  
390 *Crystallogr* **70**, 1704-1717
- 391 5. Siciliano, S. J., Rollins, T. E., DeMartino, J., Konteatis, Z., Malkowitz, L., Van Riper, G., Bondy, S., Rosen, H.,  
392 and Springer, M. S. (1994) Two-site binding of C5a by its receptor: an alternative binding paradigm for G  
393 protein-coupled receptors. *Proc Natl Acad Sci U S A* **91**, 1214-1218
- 394 6. Kawai, M., Quincy, D. A., Lane, B., Mollison, K. W., Or, Y. S., Luly, J. R., and Carter, G. W. (1992) Structure-  
395 function studies in a series of carboxyl-terminal octapeptide analogues of anaphylatoxin C5a. *J Med Chem*  
396 **35**, 220-223
- 397 7. Konteatis, Z. D., Siciliano, S. J., Van Riper, G., Molineaux, C. J., Pandya, S., Fischer, P., Rosen, H., Mumford, R.  
398 A., and Springer, M. S. (1994) Development of C5a receptor antagonists. Differential loss of functional  
399 responses. *J Immunol* **153**, 4200-4205
- 400 8. Kumar, B. A., Kumari, P., Sona, C., and Yadav, P. N. (2017) GloSensor assay for discovery of GPCR-selective  
401 ligands. *Methods Cell Biol* **142**, 27-50
- 402 9. Croker, D. E., Halai, R., Fairlie, D. P., and Cooper, M. A. (2013) C5a, but not C5a-des Arg, induces  
403 upregulation of heteromer formation between complement C5a receptors C5aR and C5L2. *Immunol Cell*  
404 *Biol* **91**, 625-633
- 405 10. Braun, L., Christophe, T., and Boulay, F. (2003) Phosphorylation of key serine residues is required for  
406 internalization of the complement 5a (C5a) anaphylatoxin receptor via a beta-arrestin, dynamin, and

- 407 clathrin-dependent pathway. *J Biol Chem* **278**, 4277-4285
- 408 11. Srivastava, A., Gupta, B., Gupta, C., and Shukla, A. K. (2015) Emerging Functional Divergence of beta-  
409 Arrestin Isoforms in GPCR Function. *Trends Endocrinol Metab* **26**, 628-642
- 410 12. Sumichika, H., Sakata, K., Sato, N., Takeshita, S., Ishibuchi, S., Nakamura, M., Kamahori, T., Ehara, S., Itoh,  
411 K., Ohtsuka, T., Ohbora, T., Mishina, T., Komatsu, H., and Naka, Y. (2002) Identification of a potent and  
412 orally active non-peptide C5a receptor antagonist. *J Biol Chem* **277**, 49403-49407
- 413 13. Li, R., Coulthard, L. G., Wu, M. C., Taylor, S. M., and Woodruff, T. M. (2013) C5L2: a controversial receptor  
414 of complement anaphylatoxin, C5a. *FASEB J* **27**, 855-864
- 415 14. Van Lith, L. H., Oosterom, J., Van Elsas, A., and Zaman, G. J. (2009) C5a-stimulated recruitment of beta-  
416 arrestin2 to the non-signaling 7-transmembrane decoy receptor C5L2. *J Biomol Screen* **14**, 1067-1075
- 417 15. Oakley, R. H., Laporte, S. A., Holt, J. A., Caron, M. G., and Barak, L. S. (2000) Differential affinities of visual  
418 arrestin, beta arrestin1, and beta arrestin2 for G protein-coupled receptors delineate two major classes of  
419 receptors. *J Biol Chem* **275**, 17201-17210
- 420 16. Ranjan, R., Dwivedi, H., Baidya, M., Kumar, M., and Shukla, A. K. (2017) Novel Structural Insights into  
421 GPCR-beta-Arrestin Interaction and Signaling. *Trends Cell Biol* **27**, 851-862
- 422 17. Kumari, P., Srivastava, A., Banerjee, R., Ghosh, E., Gupta, P., Ranjan, R., Chen, X., Gupta, B., Gupta, C.,  
423 Jaiman, D., and Shukla, A. K. (2016) Functional competence of a partially engaged GPCR-beta-arrestin  
424 complex. *Nat Commun* **7**, 13416
- 425 18. Kumari, P., Srivastava, A., Ghosh, E., Ranjan, R., Dogra, S., Yadav, P. N., and Shukla, A. K. (2017) Core  
426 engagement with beta-arrestin is dispensable for agonist-induced vasopressin receptor endocytosis and  
427 ERK activation. *Mol Biol Cell* **28**, 1003-1010
- 428 19. Cahill, T. J., 3rd, Thomsen, A. R., Tarrasch, J. T., Plouffe, B., Nguyen, A. H., Yang, F., Huang, L. Y., Kahsai, A.  
429 W., Bassoni, D. L., Gavino, B. J., Lamerdin, J. E., Triest, S., Shukla, A. K., Berger, B., Little, J. t., Antar, A.,  
430 Blanc, A., Qu, C. X., Chen, X., Kawakami, K., Inoue, A., Aoki, J., Steyaert, J., Sun, J. P., Bouvier, M., Skiniotis,  
431 G., and Lefkowitz, R. J. (2017) Distinct conformations of GPCR-beta-arrestin complexes mediate  
432 desensitization, signaling, and endocytosis. *Proc Natl Acad Sci U S A* **114**, 2562-2567
- 433 20. Gundry, J., Glenn, R., Alagesan, P., and Rajagopal, S. (2017) A Practical Guide to Approaching Biased

- 434 Agonism at G Protein Coupled Receptors. *Front Neurosci* **11**, 17
- 435 21. Ho, J. H., Stahl, E. L., Schmid, C. L., Scarry, S. M., Aube, J., and Bohn, L. M. (2018) G protein signaling-biased  
436 agonism at the kappa-opioid receptor is maintained in striatal neurons. *Sci Signal* **11**
- 437 22. Liu, H., Kim, H. R., Deepak, R., Wang, L., Chung, K. Y., Fan, H., Wei, Z., and Zhang, C. (2018) Orthosteric and  
438 allosteric action of the C5a receptor antagonists. *Nat Struct Mol Biol* **25**, 472-481
- 439 23. Robertson, N., Rappas, M., Dore, A. S., Brown, J., Bottegoni, G., Koglin, M., Cansfield, J., Jazayeri, A., Cooke,  
440 R. M., and Marshall, F. H. (2018) Structure of the complement C5a receptor bound to the extra-helical  
441 antagonist NDT9513727. *Nature* **553**, 111-114
- 442 24. Seow, V., Lim, J., Cotterell, A. J., Yau, M. K., Xu, W., Lohman, R. J., Kok, W. M., Stoermer, M. J., Sweet, M. J.,  
443 Reid, R. C., Suen, J. Y., and Fairlie, D. P. (2016) Receptor residence time trumps drug-likeness and oral  
444 bioavailability in determining efficacy of complement C5a antagonists. *Sci Rep* **6**, 24575
- 445 25. Croker, D. E., Halai, R., Fairlie, D. P., and Cooper, M. A. (2013) C5a, but not C5a-des Arg, induces  
446 upregulation of heteromer formation between complement C5a receptors C5aR and C5L2. *Immunol Cell*  
447 *Biol* **91**, 625-633
- 448 26. K.Shukla, S. (2019) Measuring surface expression and endocytosis of GPCRs using whole-cell ELISA.  
449 *Methods in Cell Biology*
- 450 27. K.Shukla, P. (2019) Measuring agonist-induced ERK MAP kinase phosphorylation for G-protein-coupled  
451 receptors. *Methods in Cell Biology*
- 452 28. Seow, V., Lim, J., Cotterell, A. J., Yau, M.-K., Xu, W., Lohman, R.-J., Kok, W. M., Stoermer, M. J., Sweet, M. J.,  
453 and Reid, R. C. (2016) Receptor residence time trumps drug-likeness and oral bioavailability in determining  
454 efficacy of complement C5a antagonists. *Scientific reports* **6**
- 455 29. Croker, D. E., Monk, P. N., Halai, R., Kaeslin, G., Schofield, Z., Wu, M. C. L., Clark, R. J., Blaskovich, M. A. T.,  
456 Morikis, D., Floudas, C. A., Cooper, M. A., and Woodruff, T. M. (2016) Discovery of functionally selective  
457 C5aR2 ligands: novel modulators of C5a signalling. *Immunol Cell Biol*
- 458
- 459
- 460

461

462

463

464

465

466

467

468

469

470

471

472

473

474

475

476

477

478

479

480

481

482

483

484

485

486

487 **Figure legends**

488 **Figure 1. A modified carboxyl-terminus C5a peptide, C5a<sup>pep</sup>, is a full agonist for Gai coupling. A.**

489 Schematic representation of C5a binding to C5aR1. There are two sites of interaction, one involving the  
490 N-terminus of C5aR1 and the other involving the extracellular loops. B. The primary sequence and  
491 modification of C5a<sup>pep</sup>, which is derived, based on the carboxyl-terminus of C5a. C. C5a<sup>pep</sup> behaves as a  
492 full-agonist in GloSensor based cAMP assay. HEK-293 cells expressing C5aR1 were transfected with F22  
493 plasmids. 24h post-transfection, the cells were stimulated with indicated concentrations of C5a and  
494 C5a<sup>pep</sup> followed by recording of bioluminescence readout. D. Gai-coupling induced by C5a and C5a<sup>pep</sup>  
495 measured in CHO cells using LANCE cAMP assay. CHO cells stably expressing C5ar1 were stimulated with  
496 indicated concentrations of respective ligands. Data presented in panels C and D represent mean ± SEM  
497 of 3-5 independent experiments.

498 **Figure 2. C5a<sup>pep</sup> is a partial agonist for βarr recruitment. A.** HEK-293 cells expressing Flag-C5aR1 and

499 either βarr1 or 2 were stimulated with indicated concentrations of different ligands followed by cross-  
500 linking using DSP. Subsequently, Flag-C5aR1 was immunoprecipitated using anti-Flag antibody agarose  
501 and co-elution of βarrs were visualized using Western blotting. The right panel shows quantification of  
502 data. B. A time-course co-immunoprecipitation experiment to measure the interaction of C5aR1 with  
503 βarr2. The experiment was performed following the protocol as indicated in panel except that cells were  
504 stimulated for different time-points. The right panel shows densitometry-based quantification of the  
505 data (average ±SEM; n=3). C. Correlation plots derived using the maximal response in cAMP assay and  
506 βarr recruitment experiments presented above.

507 **Figure 3. C5a<sup>pep</sup> induces slower endosomal trafficking of βarrs.** HEK-293 cells expressing C5aR1 and

508 βarr1/2 were stimulated with C5a and C5a<sup>pep</sup> and the trafficking patterns of βarrs were visualized using  
509 confocal microscopy for indicated time-points. Both, C5a and C5a<sup>pep</sup> induced surface localization of βarrs

510 at early time-points, however, somewhat slower endosomal trafficking of  $\beta$ arrs were observed for  
511 C5a<sup>pep</sup> as assessed by localization of  $\beta$ arrs in endosomal vesicles. The figure shows representative images  
512 from three independent experiments.

513 **Figure 4. C5a<sup>pep</sup> exhibits bias between receptor endocytosis ERK1/2 MAP kinase activation. A.** HEK-293  
514 cells expressing C5aR1 were stimulated with C5a and C5a<sup>pep</sup> for indicated time-points followed by the  
515 assessment of surface receptor levels using a whole-cell ELISA assay. C5a<sup>pep</sup> displays a weaker efficacy in  
516 promoting C5aR1 endocytosis compared to C5a. Data represent average $\pm$ SEM from five independent  
517 experiments. **B.** C5a<sup>pep</sup> induces robust activation of ERK1/2 MAP kinase at levels similar to C5a. HEK-293  
518 cells expressing C5aR1 were stimulated with respective ligands for indicated time-points followed by  
519 measurement of ERK1/2 phosphorylation using Western blotting. **C.** Densitometry-based quantification  
520 of ERK1/2 phosphorylation data presented in panel B showing average  $\pm$  mean of five independent  
521 experiments. **D.** Correlation plot derived using the responses of C5a and C5a<sup>pep</sup> in endocytosis (at 30 min  
522 time-point) and ERK1/2 phosphorylation (at 5 min time-point).

523 **Figure 5. Transducer-coupling bias of C5a<sup>pep</sup> is reversed at a chimeric C5aR1. A.** Schematic  
524 representation of the carboxyl-terminus of C5aR1 and a chimeric construct harboring the carboxyl-  
525 terminus of AVPR2, referred to as C5aV2R. V2-tail in the chimeric construct is highlighted in red. **B.**  
526 C5a<sup>pep</sup> behaves as a full-agonist in Glosensor based cAMP assay. HEK-293 cells expressing C5aV2R were  
527 transfected with F22 plasmids. 24h post-transfection, the cells were stimulated with indicated  
528 concentrations of C5a and C5a<sup>pep</sup> followed by recording of bioluminescence readout. **C.** HEK-293 cells  
529 expressing Flag-C5aV2R and either  $\beta$ arr1 were stimulated with saturating concentrations of different  
530 ligands followed by cross-linking using DSP. Subsequently, Flag-C5aV2R was immunoprecipitated using  
531 anti-Flag antibody agarose and co-elution of  $\beta$ arr1 was visualized using Western blotting. The lower  
532 panel shows quantification of the data (average $\pm$ SEM; n=3). **D.** Interaction of C5aV2R with  $\beta$ arr2

533 measured essentially in similar fashion as described in panel B (average  $\pm$ SEM; n=3).**E.** Correlation plot of  
534 transducer-coupling derived using the maximal response in cAMP assay and  $\beta$ arr recruitment  
535 experiments presented above.

536 **Figure 6. C5a<sup>pep</sup> exhibits bias at the level of cellular responses.** **A.** C5a<sup>pep</sup> is a full-agonist in Ca<sup>++</sup>  
537 mobilization assay in HMDM cells. HMDMs were first loaded with Fluo-4 calcium indicator followed by  
538 addition of respective ligands and subsequent measurement of fluorescence intensity. Data were  
539 normalized with maximal response obtained for C5a and represent mean  $\pm$  SEM of triplicate  
540 experiments performed from three independent donors. **B.** C5a<sup>pep</sup> behaves as a full-agonist for lowering  
541 of LPS-induced IL-6 release in HMDM cells. HMDMs were stimulated using 10 ng/ml LPS in the absence  
542 or presence of C5a or C5a<sup>pep</sup>. Subsequently, the levels of IL-6 present in the supernatant after 24h  
543 stimulation were quantified using ELISA, background-corrected with the values obtained for SFM/BSA  
544 and normalized with maximal response for LPS (i.e. treated as 100 %). Data represent mean $\pm$ SEM of  
545 triplicate measurements conducted in cells from four independent donors. **C.** C5a<sup>pep</sup> elicits only partial-  
546 agonist response in migration of human PMNs. Freshly isolated PMNs seeded into trans-well inserts  
547 were stimulated with respective ligands added to the receiver wells and then allowed to migrate for 1h.  
548 The number of migrated cells was recorded and normalized to the maximal C5a-induced migration. Data  
549 represents mean  $\pm$  SEM of triplicate measurements conducted in cells from 3 independent donors. **D.**  
550 The correlation plot between the LPA-induced IL-6 release and PMN migration reveals bias induced by  
551 Ca5<sup>pep</sup> at the level of cellular responses.

552

553

554



Figure 1.

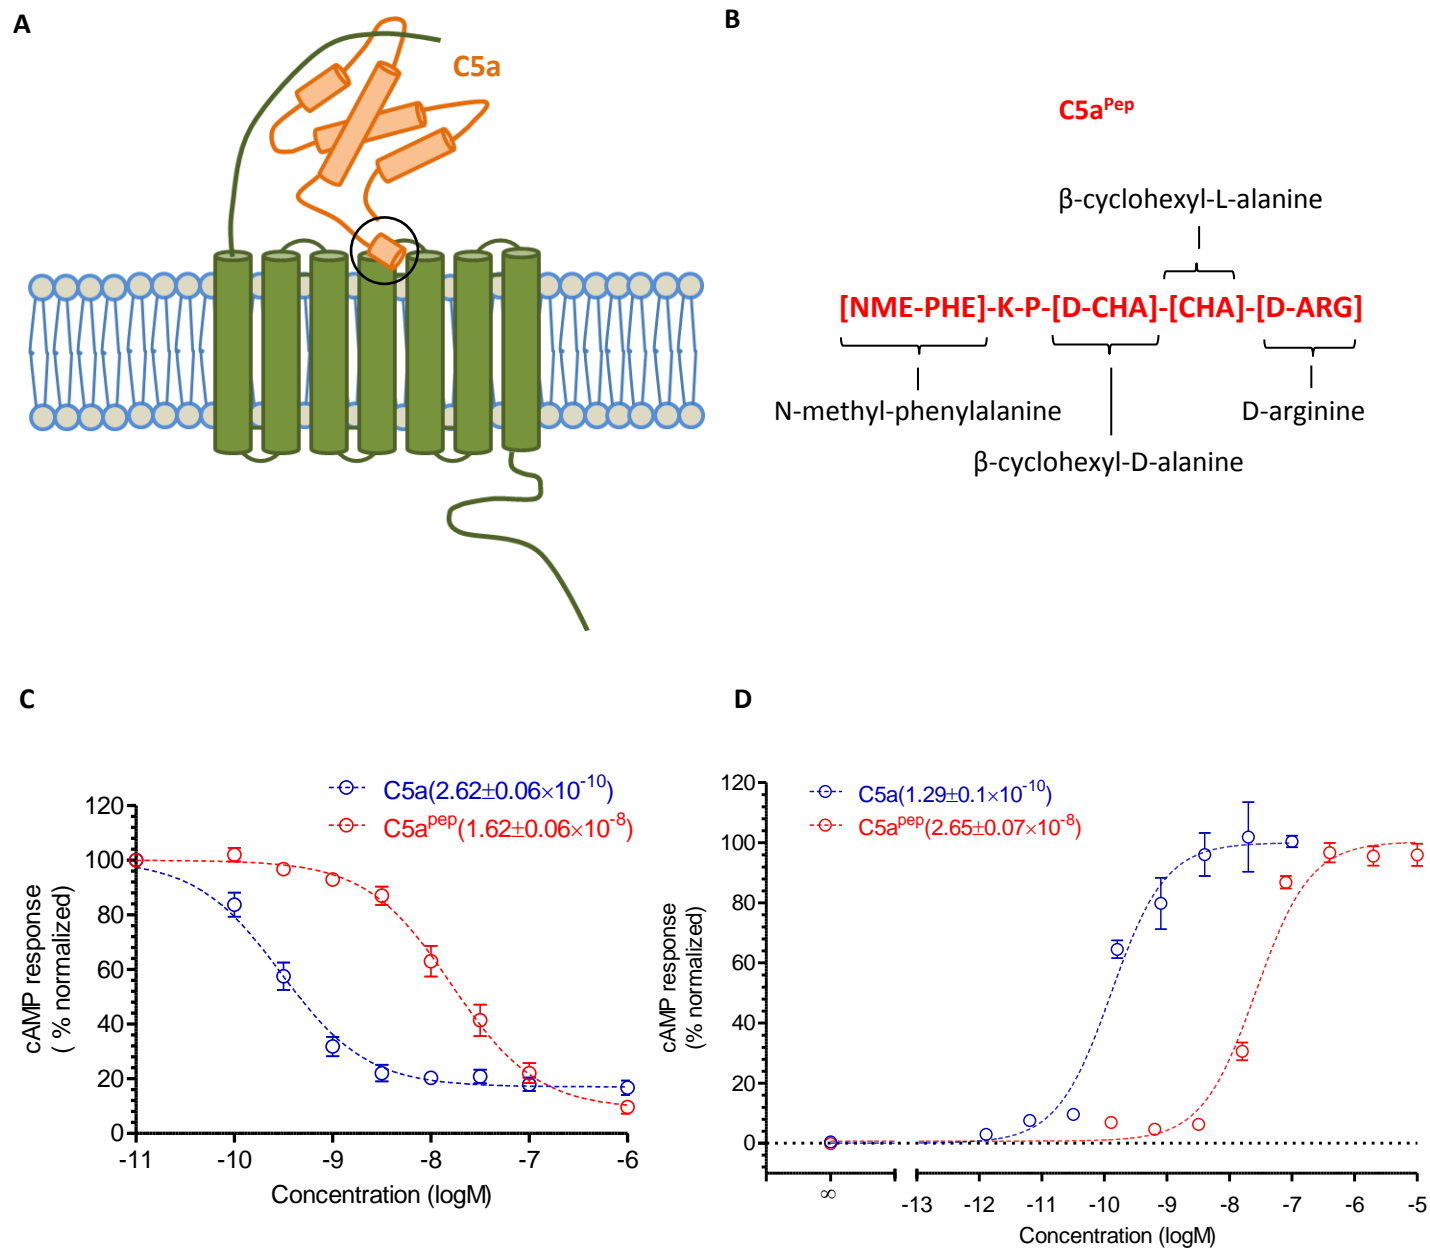

**Figure 2.**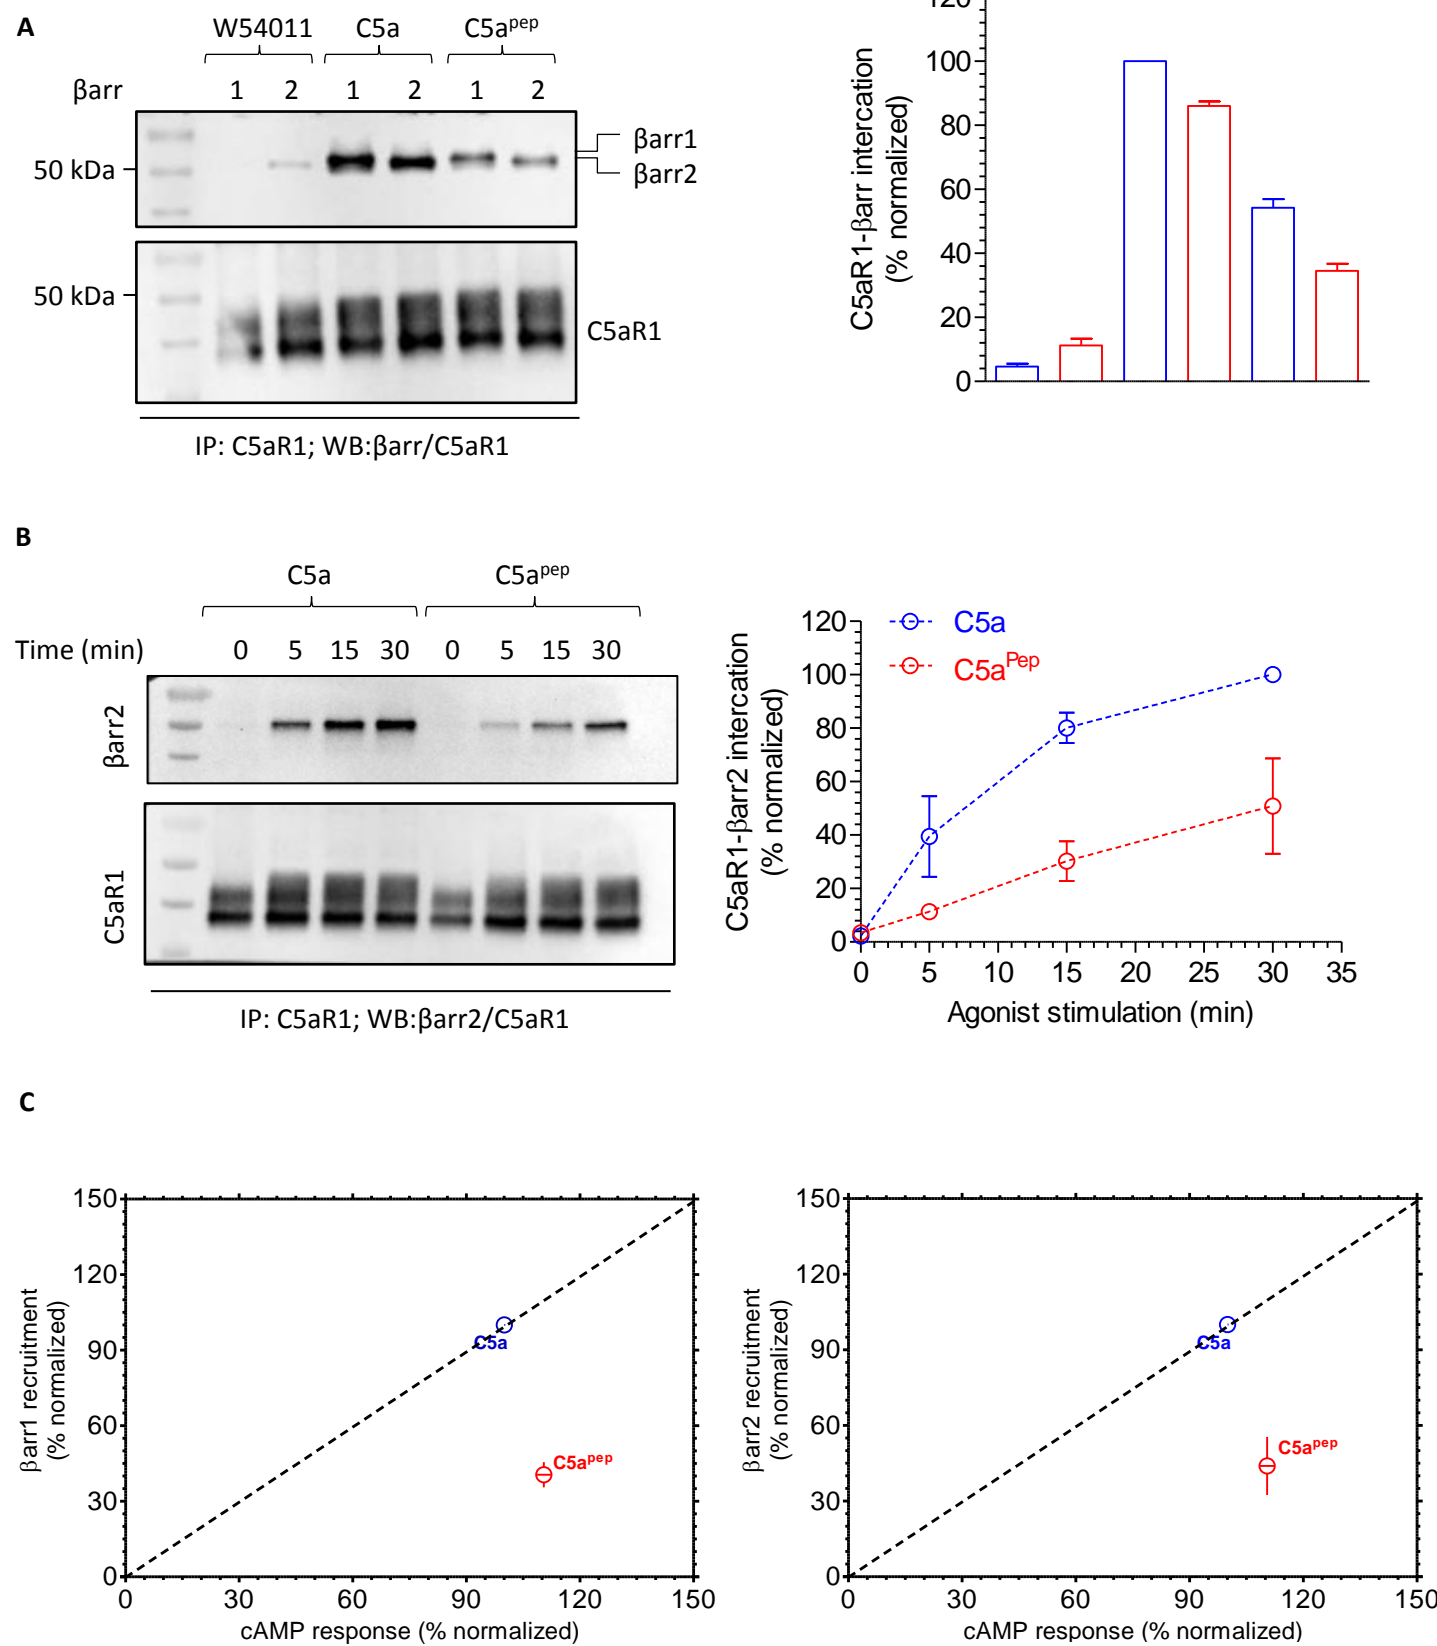

Figure 3.

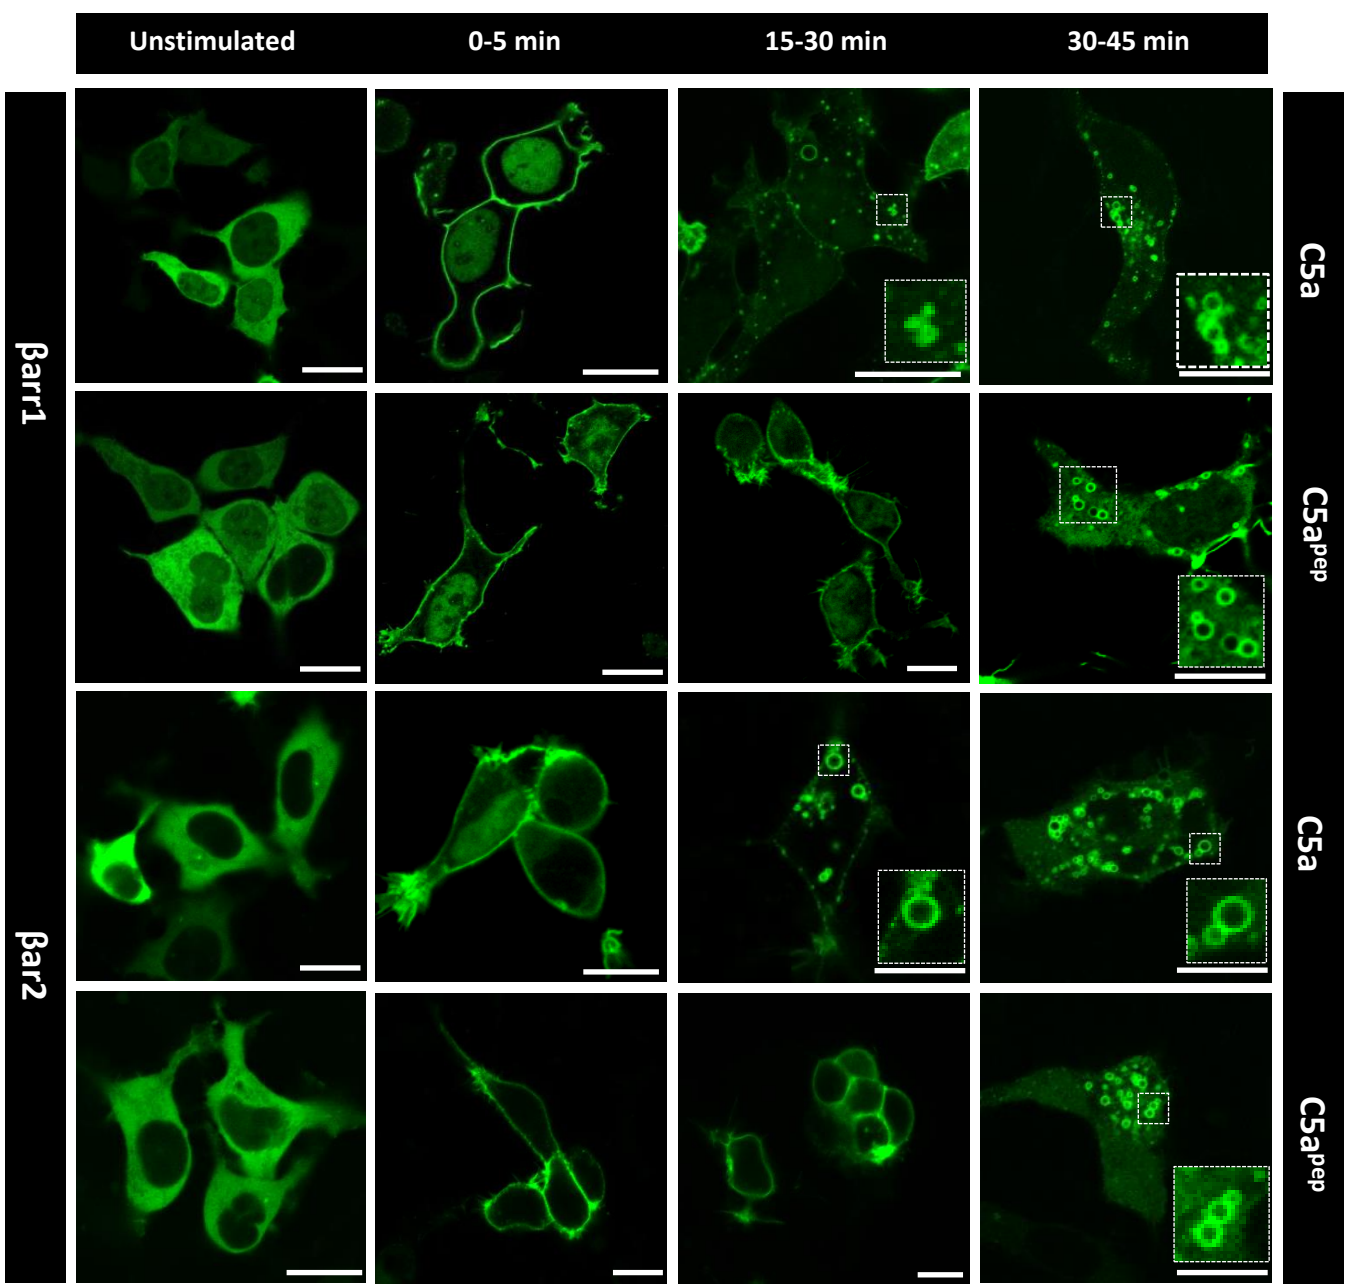

Figure 4.

A

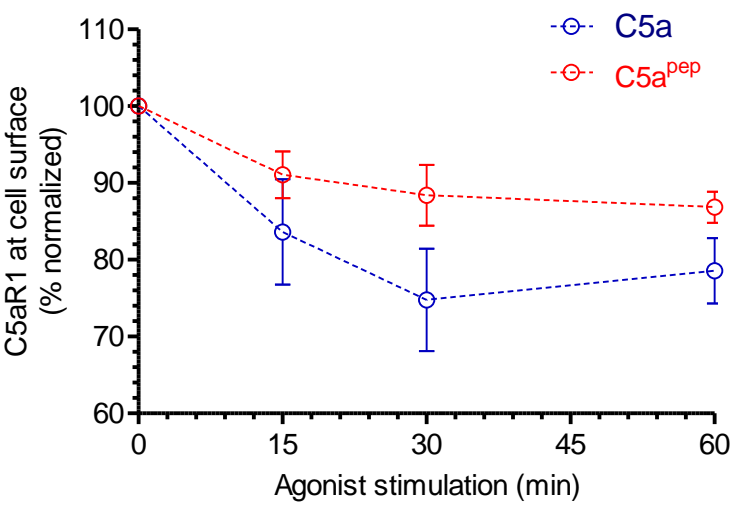

B

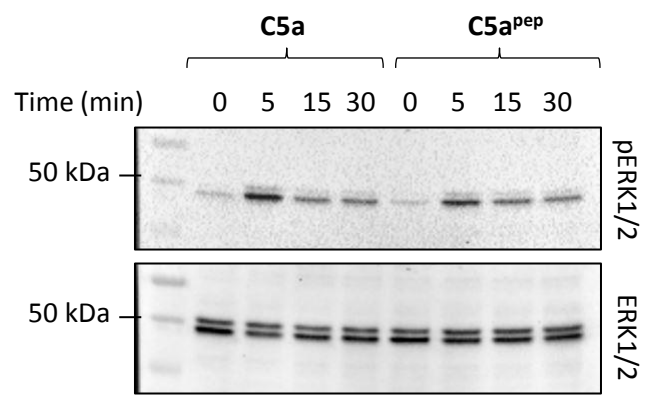

C

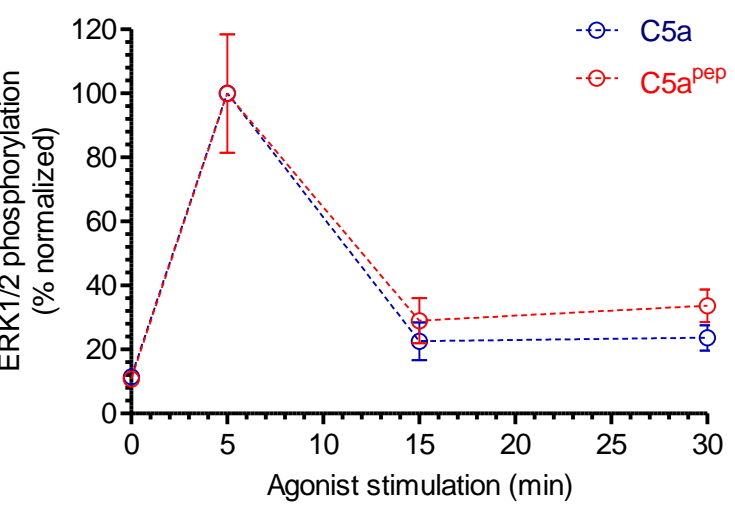

D

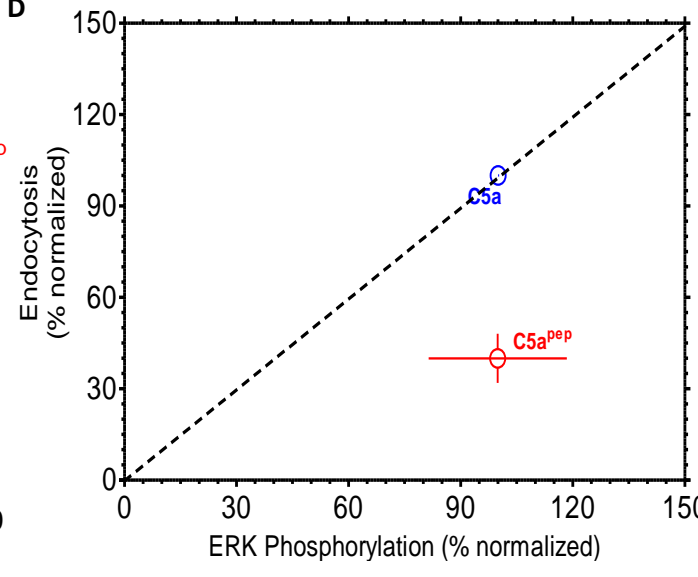



**Figure 6.**

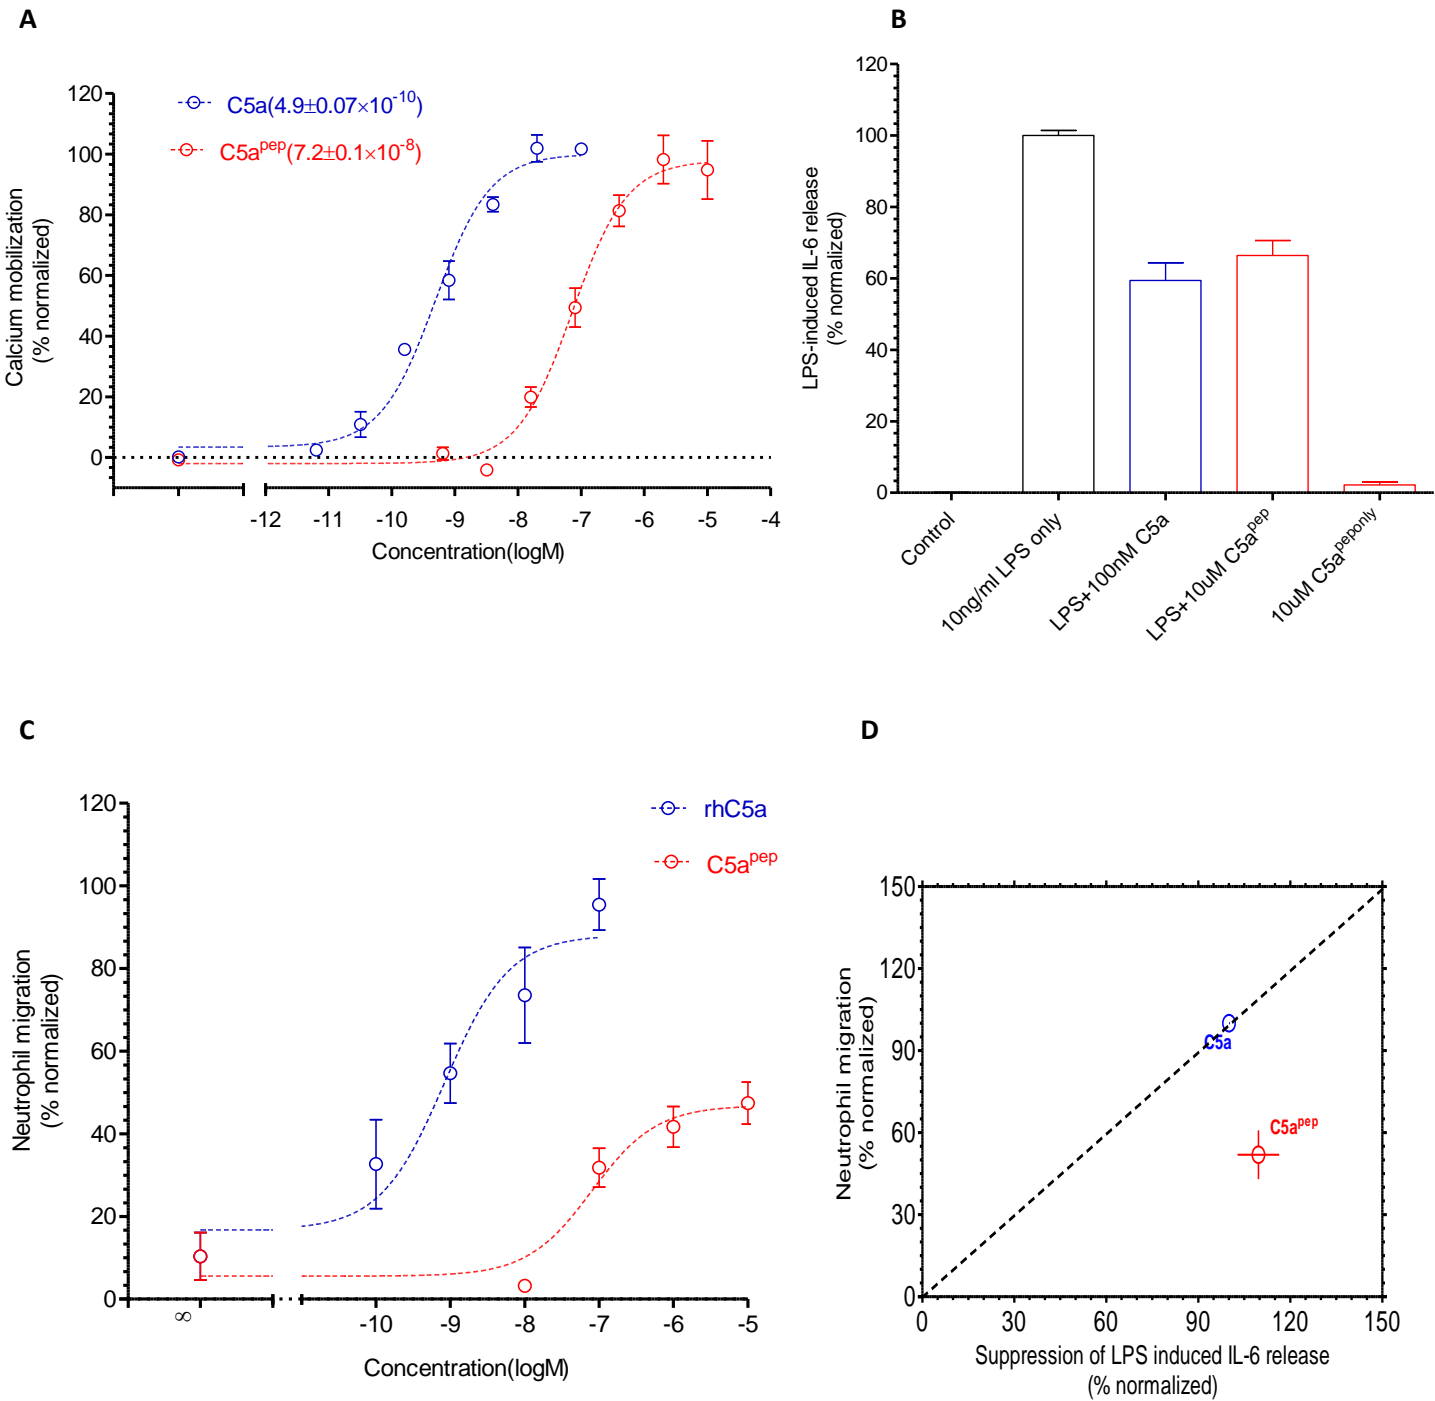

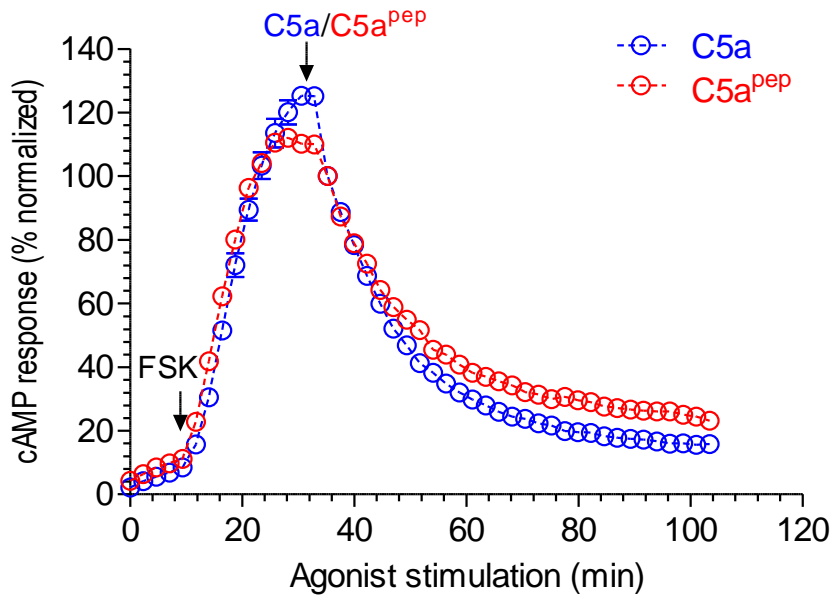

**Figure S1. C5a<sup>pep</sup> behaves as a full-agonist in GloSensor based cAMP time-kinetics assay.** HEK-293 cells expressing C5aR1 were transfected with F22 plasmids. 24h post-transfection, the cells were stimulated with indicated concentrations of C5a and C5a<sup>pep</sup> followed by recording of bioluminescence readout.

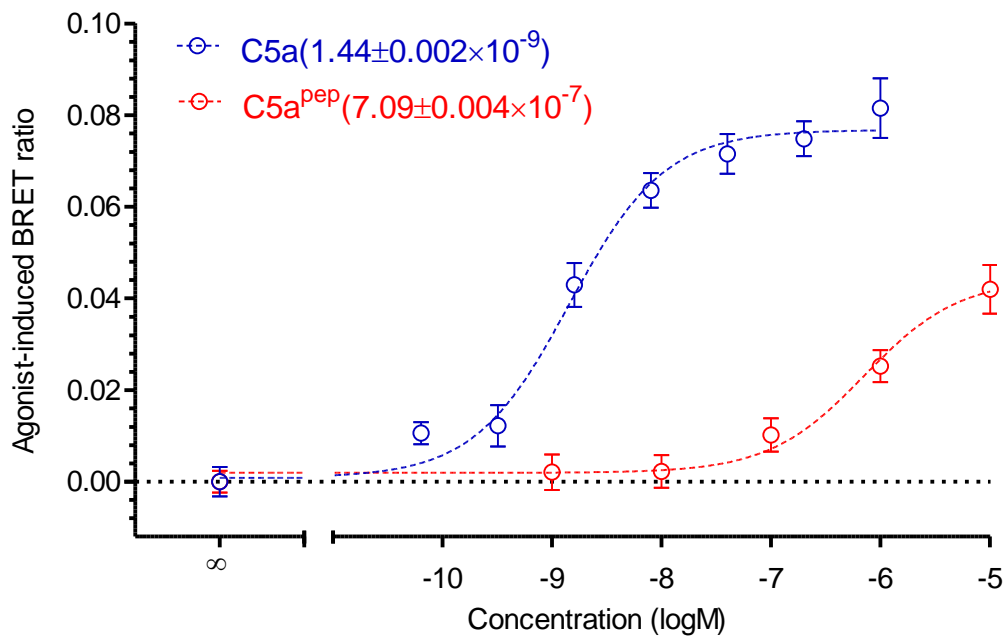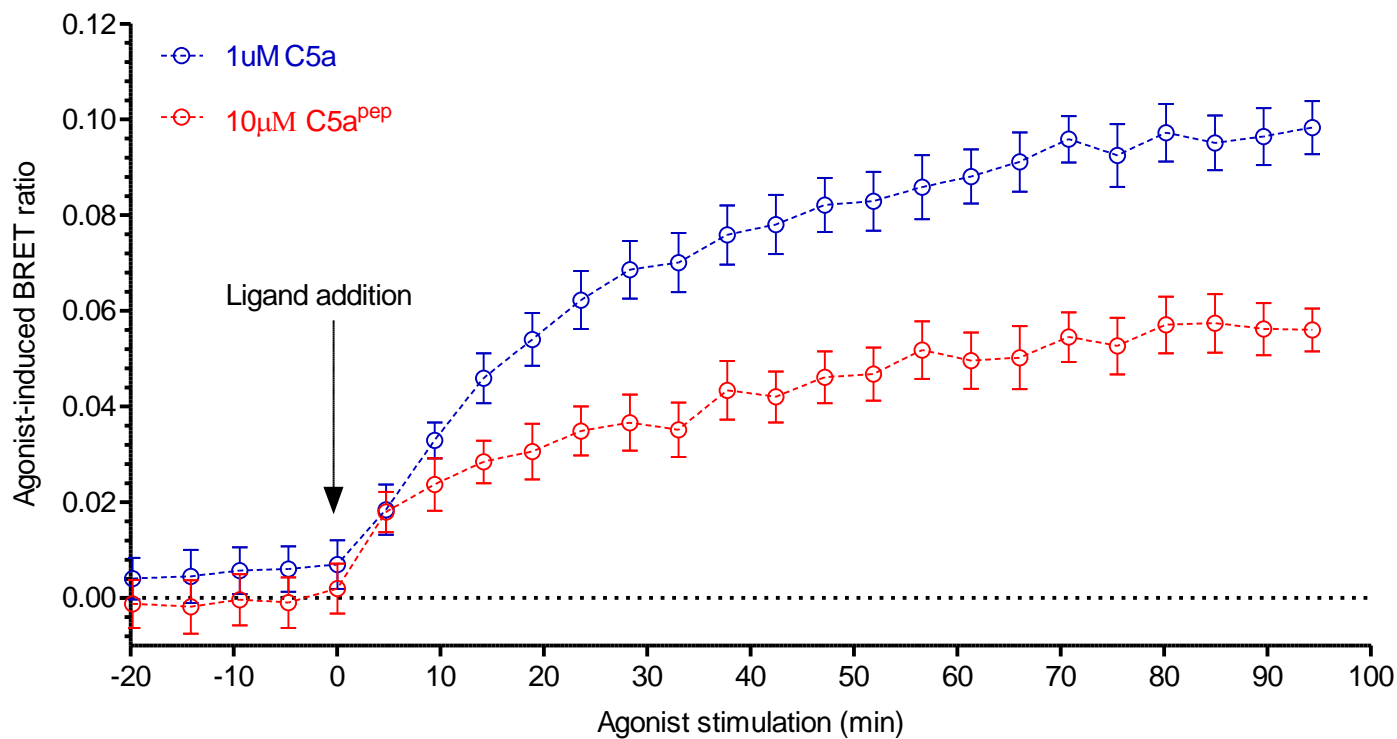

**Figure S2. C5a<sup>pep</sup> promotes recruitment of  $\beta$ arr2 at C5aR2.** HEK-293 cells expressing C5aR2-Venus and  $\beta$ arr2-Rluc8 constructs were firstly incubated with luciferase-substrate for 2h. Subsequently, cells were stimulated with respective ligands and BRET signals were monitored using either a dose response curve (upper panel) or time-kinetics (lower panel). Data represent average  $\pm$  SEM of three independent experiments.



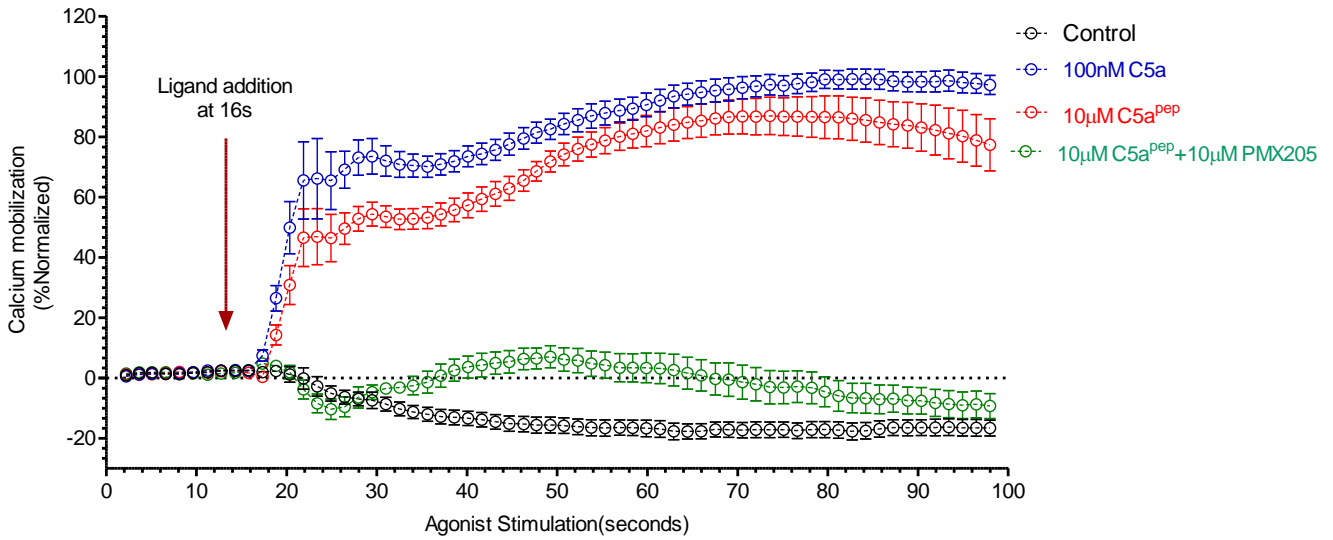

**Figure S3. C5a<sup>pep</sup> behaves as a full-agonist in Ca<sup>++</sup> mobilization time-shift assay.** HMDMs were stained with Fluo-4 dye in assay buffer followed by stimulation with respective ligands. Ligands were added at 16s and fluorescence was continually monitored for 100s.

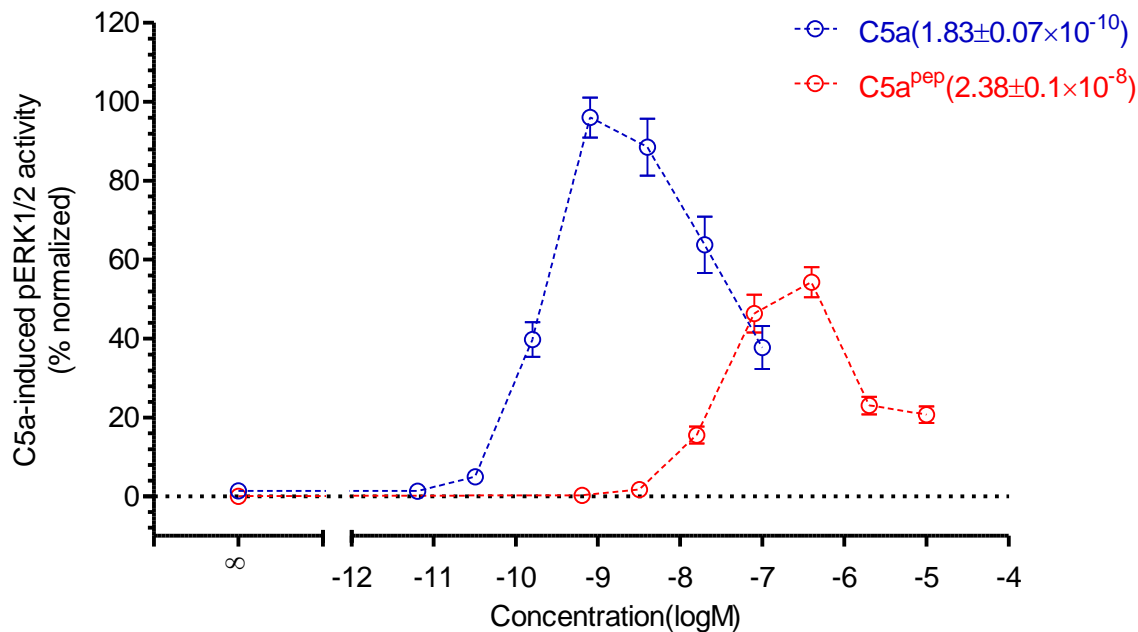

**Figure S4. C5a<sup>pep</sup> induces sub-maximal ERK1/2 phosphorylation in HMDMs.** HMDMs were serum starved overnight followed by incubation with respective ligands for 10min at room-temperature. Cells were lysed using AlphaLISA lysis buffer. For detection of phosphor-ERK1/2, cell lysate was added to donor and acceptor reaction mix and incubated at room temperature for 2hour. On a Tecan Spark 20M, following laser irradiation of donor beads at 680 nm, the chemiluminescence of acceptor beads at 615 nm was recorded.
